# Supplementary material for: Ionic liquid-mediated epitaxy of high-quality C60 crystallites in a vacuum
Source: Royal Society of Chemistry journal article supplement (doi:10.1039/c2ce25163a), 2012-01-01
Supplement: c2ce25163a.pdf [file c2ce25163a.pdf]

### Supplementary Information

Raman spectra were measured by using an Ar ion laser (514.5 nm) as an excitation source, focused onto the samples with an objective lens (N.A.=0.75), where the irradiated power was estimated around  $4 \text{ mW cm}^{-2}$  and the spectra were accumulated for 600 s.

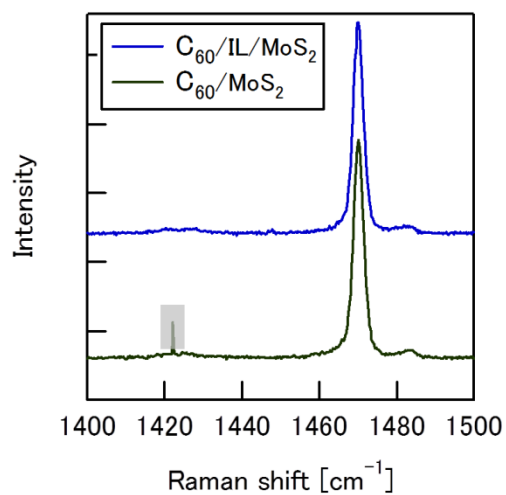

**Fig. S1.** Raman spectra of C<sub>60</sub> crystallites grown by vacuum deposition with or without ILs on MoS<sub>2</sub>. A gray-covered peak was attributed to a cosmic-ray.

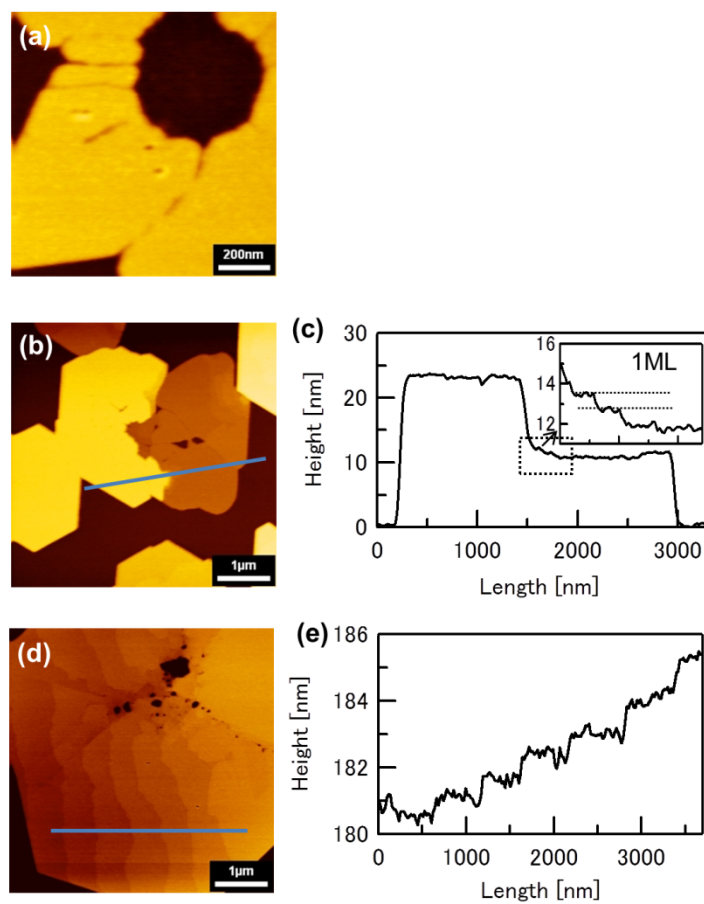

**Fig. S2.** (a) An expanded AFM image of the star-like crystallite, (b, c & d, e) 2D-AFM topographic images of C<sub>60</sub> crystallites for the samples as shown in Fig. 7b and d, respectively, together with the cross-sectional height profiles along the blue lines.
